# Supplementary material
Source: PubMed Central journal article supplement (PMC2981485)
Supplement: blood-2010-02-271957_1.pdf [file blood-2010-02-271957_1.pdf]

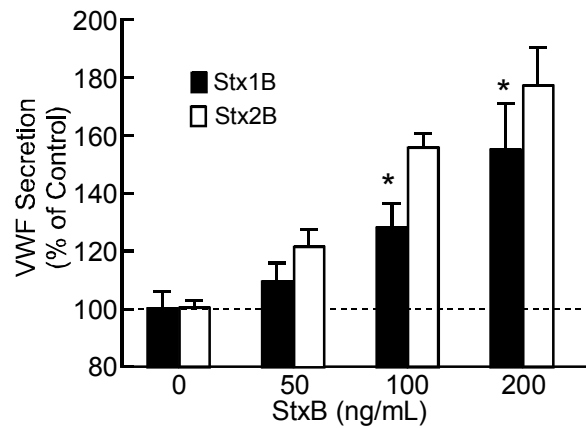

**Figure S1. Comparison of the dose response to Stx1B and Stx2B**

Purified, His-tagged Stx1B (*filled bars*) or Stx2B (*open bars*) (BEI resources) was added to confluent HUVEC monolayers at the indicated concentrations, and secreted VWF that adhered to cell surface was detected using a polyclonal antibody against VWF conjugated to HRP (clone P226, DAKO). Note that at the concentrations of 100 and 200 ng/ml, Stx2B is more potent than Stx1B in stimulating VWF secretion (\*,  $P < 0.05$ ). Data represent the mean value  $\pm$  SE, normalized to the control condition (no StxB). The experiment was repeated three times with similar results.

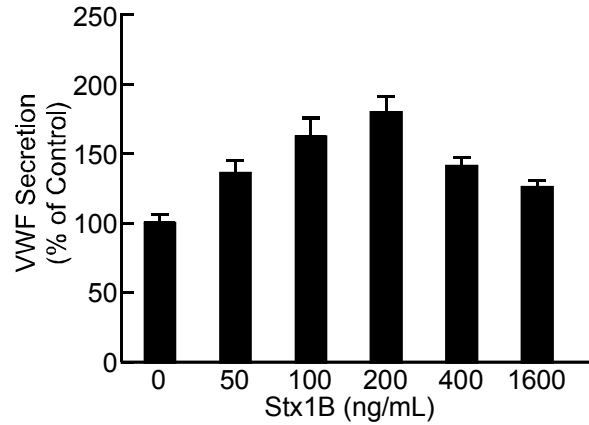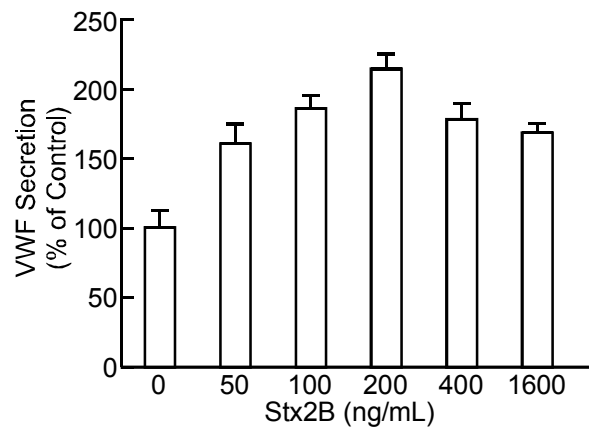

**Figure S2. Excess StxB inhibits VWF secretion.** Purified, His-tagged Stx1B (*filled bars*) or Stx2B (*open bars*) (BEI resources) was added to confluent HUVEC monolayers at the indicated concentrations, and secreted VWF that adhered to cell surface was detected using a polyclonal antibody against VWF conjugated to HRP (clone P226, DAKO). Note that at concentrations higher than 200 ng/mL, StxB induced VWF secretion is reduced. Data represent the mean value  $\pm$  SE, normalized to the control condition (no StxB). The experiment was repeated three times with similar results.
